# Supplementary material
Source: Royal Society of Chemistry journal article supplement (doi:10.1039/d6su00210b)
Supplement: d6su00210b1.pdf [file d6su00210b1.pdf]

## Supplementary Materials

### Ambient, Two-Step CO<sub>2</sub>-to-CaCO<sub>3</sub> Conversion: Alkali-Activated H<sub>2</sub>O<sub>2</sub>-Promoted Carbonate CO<sub>2</sub> Capture and Direct Calcite Mineralization

Eugene Shirman<sup>a,\*</sup> and Yoel Sasson<sup>a</sup>

<sup>a</sup> Casali Center of Applied Chemistry, Institute of Chemistry, The Hebrew University of Jerusalem, Jerusalem, 9190401, Israel

\*Corresponding author: eugene.shirman@mail.huji.ac.il

ORCID: Eugene Shirman 0000-0002-4702-9578; Yoel Sasson 0000-0002-0701-681X

#### Table of Contents

| Item      | Description                                                                                                                                          | Page Number |
|-----------|------------------------------------------------------------------------------------------------------------------------------------------------------|-------------|
| Figure S1 | SEM image of CaCO <sub>3</sub> from 7 wt% Na <sub>2</sub> CO <sub>3</sub> + 0.7 wt% H <sub>2</sub> O <sub>2</sub> liquor                             | S2          |
| Figure S2 | EDS spectrum corresponding to CaCO <sub>3</sub> from 7 wt% Na <sub>2</sub> CO <sub>3</sub> + 0.7 wt% H <sub>2</sub> O <sub>2</sub> liquor            | S4          |
| Figure S3 | Elemental mapping of CaCO <sub>3</sub> from 7 wt% Na <sub>2</sub> CO <sub>3</sub> + 0.7 wt% H <sub>2</sub> O <sub>2</sub> liquor (from SEM analysis) | S5          |
| Figure S4 | SEM image of CaCO <sub>3</sub> from 25 wt% K <sub>2</sub> CO <sub>3</sub> + 2.5 wt% H <sub>2</sub> O <sub>2</sub> liquor                             | S6          |
| Figure S5 | EDS spectrum corresponding to CaCO <sub>3</sub> from 25 wt% K <sub>2</sub> CO <sub>3</sub> + 2.5 wt% H <sub>2</sub> O <sub>2</sub> liquor            | S8          |
| Figure S6 | Elemental mapping of CaCO <sub>3</sub> from 25 wt% K <sub>2</sub> CO <sub>3</sub> + 2.5 wt% H <sub>2</sub> O <sub>2</sub> liquor (from SEM analysis) | S9          |
| Table S1  | EDS composition of CaCO <sub>3</sub> from 7 wt% Na <sub>2</sub> CO <sub>3</sub> + 0.7 wt% H <sub>2</sub> O <sub>2</sub> liquor                       | S3          |
| Table S2  | EDS composition of CaCO <sub>3</sub> from 25 wt% K <sub>2</sub> CO <sub>3</sub> + 2.5 wt% H <sub>2</sub> O <sub>2</sub> liquor                       | S7          |
| Table S3  | Regional consumables price decks used for LCOC calculations (Q3 2025, USD t <sup>-1</sup> )                                                          | S10         |
| Table S4  | Utilization factors, u, used for LCOC calculations                                                                                                   | S11         |

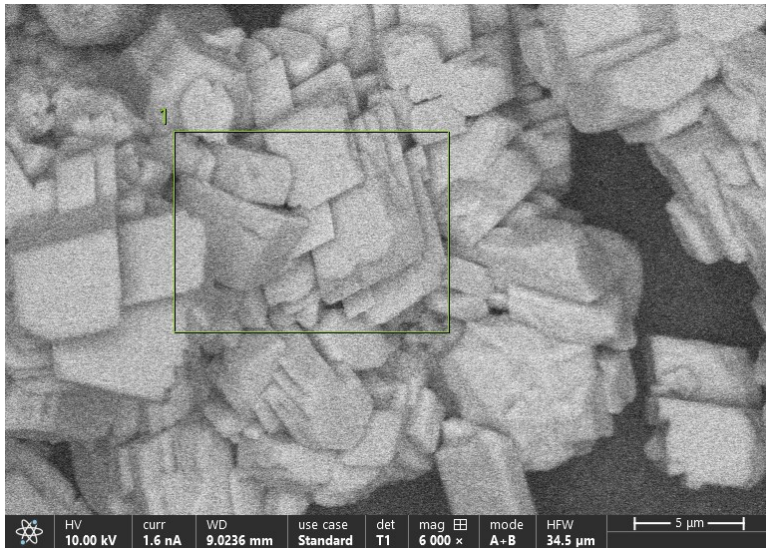

**Figure S1:** SEM image of CaCO<sub>3</sub> from 7 wt% Na<sub>2</sub>CO<sub>3</sub> + 0.7 wt% H<sub>2</sub>O<sub>2</sub> liquor.

**Table S1.** EDS composition of CaCO<sub>3</sub> from 7 wt% Na<sub>2</sub>CO<sub>3</sub> + 0.7 wt% H<sub>2</sub>O<sub>2</sub> liquor.

| <b>Element</b> | <b>Line</b> | <b>At. %</b> | <b>Wt. %</b> | <b>Net Counts</b> | <b>At. % Error</b> | <b>Wt. % Error</b> |
|----------------|-------------|--------------|--------------|-------------------|--------------------|--------------------|
| C              | K           | 7.0          | 3.8          | 72,528            | 0.0                | 0.0                |
| O              | K           | 66.0         | 47.6         | 214,622           | 0.3                | 0.2                |
| Ca             | K           | 27.0         | 48.6         | 280,804           | 0.1                | 0.2                |

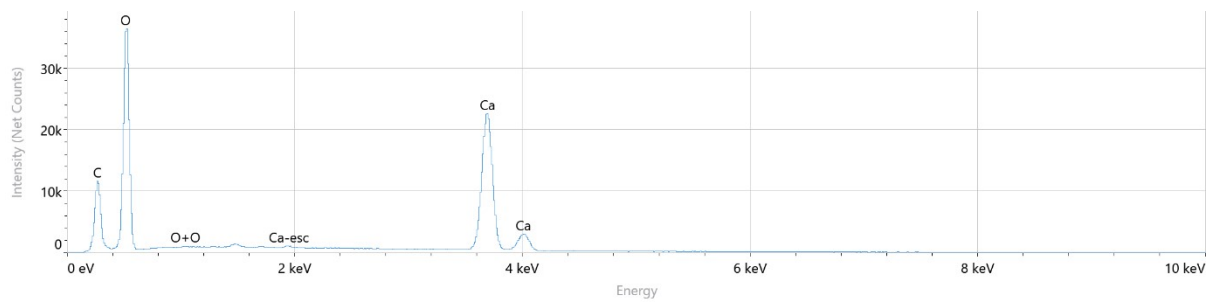

**Figure S2:** EDS spectrum corresponding to  $\text{CaCO}_3$  from 7 wt%  $\text{Na}_2\text{CO}_3$  + 0.7 wt%  $\text{H}_2\text{O}_2$  liquor.

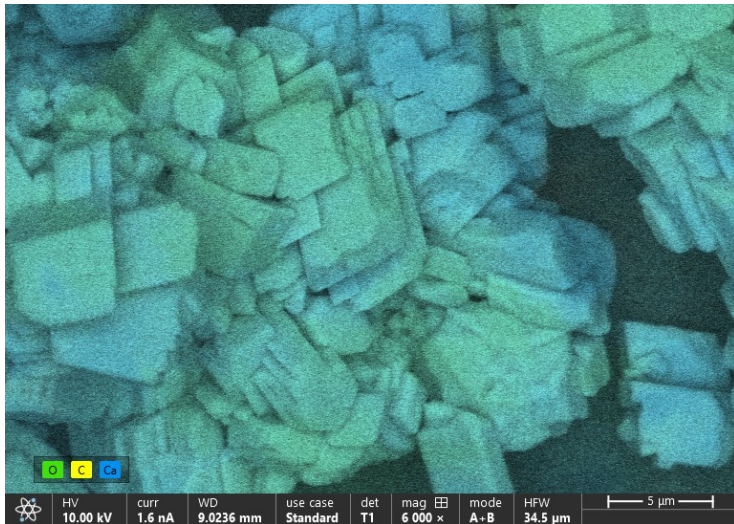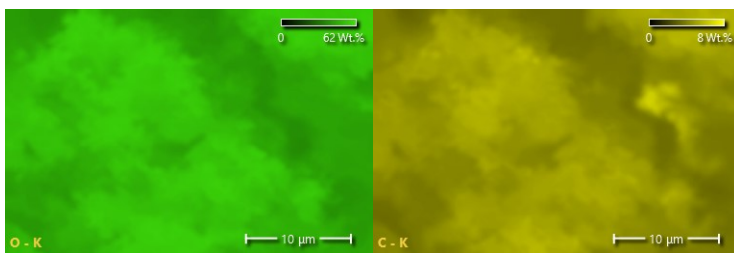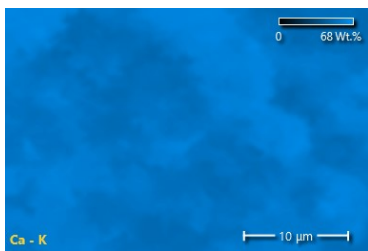

**Figure S3:** Elemental mapping of  $\text{CaCO}_3$  from 7 wt%  $\text{Na}_2\text{CO}_3$  + 0.7 wt%  $\text{H}_2\text{O}_2$  liquor (from SEM analysis)

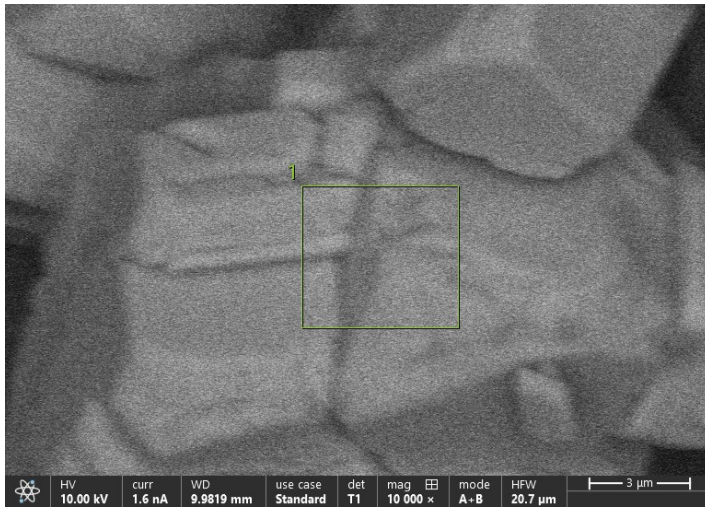

**Figure S4:** SEM image of CaCO<sub>3</sub> from 25 wt% K<sub>2</sub>CO<sub>3</sub> + 2.5 wt% H<sub>2</sub>O<sub>2</sub> liquor.

**Table S2:** EDS composition of CaCO<sub>3</sub> from 25 wt% K<sub>2</sub>CO<sub>3</sub> + 2.5 wt% H<sub>2</sub>O<sub>2</sub> liquor.

| <b>Element</b> | <b>Line</b> | <b>At. %</b> | <b>Wt. %</b> | <b>Net Counts</b> | <b>At. % Error</b> | <b>Wt. % Error</b> |
|----------------|-------------|--------------|--------------|-------------------|--------------------|--------------------|
| C              | K           | 9.1          | 5.1          | 124,548           | 0.0                | 0.0                |
| O              | K           | 66.4         | 49.3         | 294,910           | 0.3                | 0.2                |
| Ca             | K           | 24.5         | 45.6         | 326,903           | 0.1                | 0.2                |

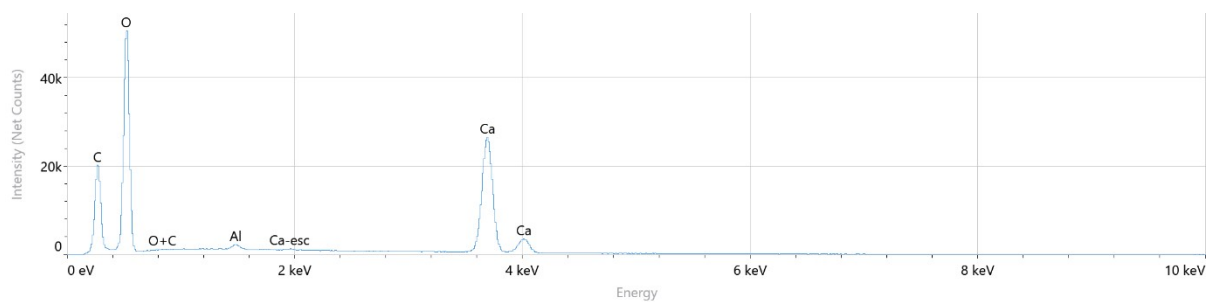

**Figure S5:** EDS spectrum corresponding to  $\text{CaCO}_3$  from 25 wt%  $\text{K}_2\text{CO}_3$  + 2.5 wt%  $\text{H}_2\text{O}_2$  liquor.

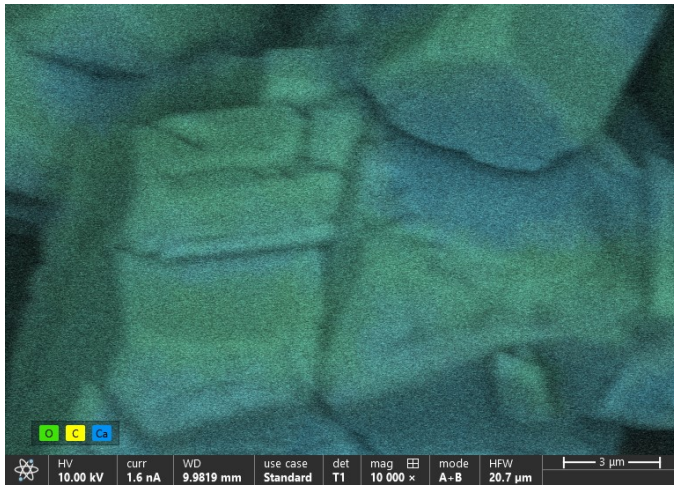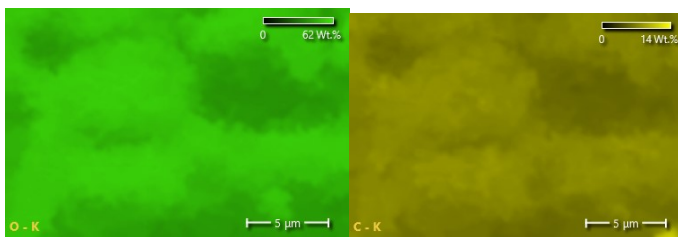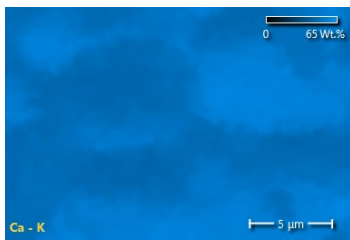

**Figure S6:** Elemental mapping of  $\text{CaCO}_3$  from 25 wt%  $\text{K}_2\text{CO}_3$  + 2.5 wt%  $\text{H}_2\text{O}_2$  liquor (from SEM analysis)

**Table S3.** Regional consumables price decks used for LCOC calculations (Q3 2025, USD t<sup>-1</sup>)

| Region         | Na <sub>2</sub> CO <sub>3</sub> | K <sub>2</sub> CO <sub>3</sub> | CaCl <sub>2</sub> | H <sub>2</sub> O <sub>2</sub> (100%) |
|----------------|---------------------------------|--------------------------------|-------------------|--------------------------------------|
| US             | 280                             | 859                            | 330               | 1,639                                |
| EU             | 372                             | 1,584                          | 235               | 1,087                                |
| Northeast Asia | 263                             | 1,161                          | 150               | 770                                  |
| Southeast Asia | 248                             | 1,060                          | 239               | 965                                  |

**References for Table S3** IMARC Group, *Soda Ash Prices Show Strong Recovery After Q2 Decline: What's Next for the Market?*, <https://www.imarcgroup.com/soda-ash-pricing-report>, (accessed March 2026). IMARC Group, *Potassium Carbonate Price Index, Chart, Trend & Forecast*, <https://www.imarcgroup.com/potassium-carbonate-pricing-report>, (accessed March 2026). IMARC Group, *Calcium Chloride Prices, Index, Trend 2025 and Forecast*, <https://www.imarcgroup.com/calcium-chloride-pricing-report>, (accessed March 2026). PriceWatch, *PriceWatch, Calcium Chloride Price Trend and Forecast*, <https://www.price-watch.ai/calcium-chloride-prices>, (accessed March 2026). ChemAnalyst, *Hydrogen Peroxide Prices, Trend, Chart, News and Forecast*, <https://www.chemanalyst.com/Pricing-data/hydrogen-peroxide-1169>, (accessed March 2026). PriceWatch, *PriceWatch, Hydrogen Peroxide Price Trend and Forecast*, <https://www.price-watch.ai/hydrogen-peroxide-prices>, (accessed March 2026).

**Table S4.** Utilization factors, u, used for LCOC calculations.

| Formulation                            | Spec | Utilization, u |
|----------------------------------------|------|----------------|
| Na <sub>2</sub> CO <sub>3</sub> 7 wt%  | 90%  | 0.875          |
| Na <sub>2</sub> CO <sub>3</sub> 7 wt%  | 95%  | 0.788          |
| Na <sub>2</sub> CO <sub>3</sub> 10 wt% | 90%  | 0.525          |
| Na <sub>2</sub> CO <sub>3</sub> 10 wt% | 95%  | 0.450          |
| K <sub>2</sub> CO <sub>3</sub> 20 wt%  | 90%  | 0.900          |
| K <sub>2</sub> CO <sub>3</sub> 20 wt%  | 95%  | 0.875          |
| K <sub>2</sub> CO <sub>3</sub> 25 wt%  | 90%  | 0.700          |
| K <sub>2</sub> CO <sub>3</sub> 25 wt%  | 95%  | 0.663          |

**Common assumptions.**

- Mass ledger (per tCO<sub>2</sub>): Na<sub>2</sub>CO<sub>3</sub> 2.408 t; K<sub>2</sub>CO<sub>3</sub> 3.140 t; CaCl<sub>2</sub> 2.522 t; CaCO<sub>3</sub> 2.274 t.
- Regional price decks were compiled from source-reported market benchmarks.
- Country-level prices were used as regional proxies where regional averages were unavailable.
- For price decks lacking direct Q3 2025 quotations, Q3 2025 values were back-calculated from reported December 2025 prices and the corresponding source-reported September–December change.
- H<sub>2</sub>O<sub>2</sub> term: 0.10 × carbonate mass (normalized to 100%), included as non-zero.
- Specification mapping:  
$$u(95\%) = \frac{1}{2}[u(90\%) + u(100\%)]$$
- No coproduct credits. Totals rounded to nearest dollar; component sums may differ by ±1 USD due to rounding.
